# Supplementary material for: A sensitive and group-specific monoclonal antibody-based indirect competitive ELISA for the determination of salbutamol in swine meat and liver samples
Source: Royal Society of Chemistry journal article supplement (doi:10.1039/c7ay01628j), 2017-01-01
Supplement: c7ay01628j1.pdf [file c7ay01628j1.pdf]

**Supporting information**

**A sensitive and group-specific monoclonal antibody-based  
indirect competitive ELISA for the determination of salbutamol  
in swine meat and liver samples**

Yin Yuan<sup>a</sup>, Yingying Zhao<sup>a</sup>, Kang Wu<sup>b\*</sup>, Hong Yang<sup>c</sup>, Kang Zhao<sup>a</sup>, Jianguo Li<sup>a\*</sup>,

Anping Deng<sup>a\*</sup>

<sup>a</sup>The Key Lab of Health Chemistry & Molecular Diagnosis of Suzhou, College of  
Chemistry, Chemical Engineering & Materials Science, Soochow University,  
Renai Road 199, Suzhou 215123, China

<sup>b</sup>School of Biology & Basic Medical Science, Soochow University, Suzhou,  
215123, China

<sup>c</sup>College of Pharmacy Sciences, Soochow University, Suzhou, 215123, China

\* Corresponding author: Tel: +86 512 65884630; Fax: +86 512 65884630

e-mail: wukang650202@163.com; lijgsd@suda.edu.cn; denganping@suda.edu.cn

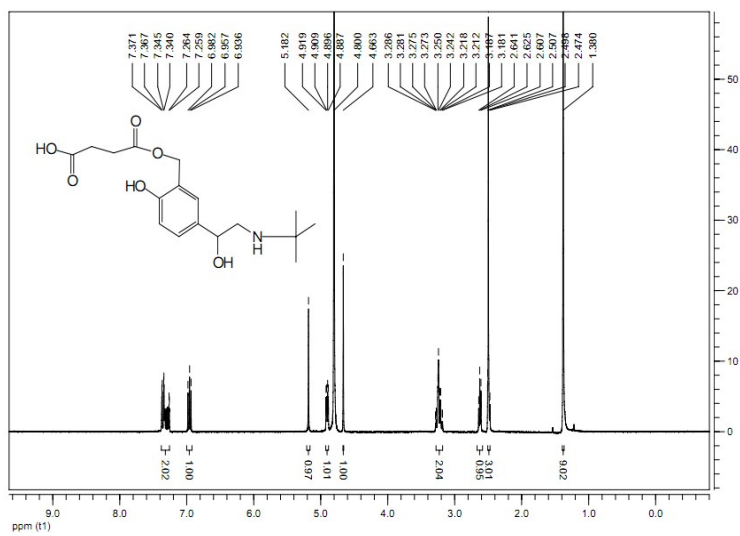

**Fig. S1.** The  $^1\text{H}$  NMR results of salbutamol derivative
